# Supplementary material for: Unexpected identification of obesity-associated mutations in LEP and MC4R genes in patients with anorexia nervosa
Source: Springer Nature journal article supplement (doi:10.1038/s41598-024-57517-w), 2024-03-25
Supplement: MOESM1 [file 41598_2024_57517_MOESM1_ESM.pdf]

## Supplementary Material

### Unexpected identification of obesity-associated mutations in *LEP* and *MC4R* genes in patients with anorexia nervosa

Luisa Sophie Rajcsanyi, Yiran Zheng, Beate Herpertz-Dahlmann, Jochen Seitz, Martina de Zwaan, Wolfgang Herzog, Stefan Ehrlich, Stephan Zipfel, Katrin Giel, Karin Egberts, Roland Burghardt, Manuel Föcker, Jochen Antel, Pamela Fischer-Posovszky, Johannes Hebebrand and Anke Hinney

**Supplementary Table 1: List of used primers**

| Gene        | Fragment | Forward primer       | Reverse primer        | Fragment size (bp) |
|-------------|----------|----------------------|-----------------------|--------------------|
| <i>LEP</i>  | Exon 1   | TCATCCCCGTCTGGTAATGT | CTATCTGGGTCCAGTGCCACT | 342                |
|             | Exon 2   | GATTCCTCCCACATGCTGAG | TGCAATGCTCTTCAATCCTG  | 496                |
| <i>MC4R</i> | Exon 1   | ACTGAGACGACTCCCTGAC  | TGCAGAAGTACAATATTCAGG | 1146               |

**Supplementary Table 2: Previously published *in vitro* studies for the detected *LEP* variants.**

| Variant                   | Amino acid exchange | Data extracted from... | Number of studies found* | <i>In vitro</i> data available? | Study by               | PMID     | Implication |
|---------------------------|---------------------|------------------------|--------------------------|---------------------------------|------------------------|----------|-------------|
| rs201523306               | p.Cys7=             | LitVar <sup>2</sup>    | 0                        | No                              | NA                     | NA       | NA          |
| rs13306517                | p.Gln25=            | LitVar <sup>2</sup>    | 13                       | No                              | NA                     | NA       | NA          |
| no rsID<br>g.128254532C/T | p.Ser91=            | LitVar <sup>2</sup>    | 1                        | No                              | NA                     | NA       | NA          |
| rs17151919                | p.Val94Met          | LitVar <sup>2</sup>    | 16                       | Yes                             | Yaghootkar et al. 2020 | 32917775 | Yes         |

All previously published data regarding the here detected variants located in *LEP* were extracted from LitVar<sup>2</sup> (<sup>1</sup>). The number of studies reported by LitVar<sup>2</sup> solely represents all studies found by the tool. This does not imply that the relevant variant, allele, consequence or phenotype was referred to in the respective publications (\*). For certain variants no data was available (NA). An implication was present if differences between the wildtype and mutant protein were present in at least one characteristics or analysis. The complete output of LitVar<sup>2</sup> can be found in Supplementary Table 4. NA: not available. PMID: PubMedID.

**Supplementary Table 3: Previously published *in vitro* studies for the detected *MC4R* variants.**

| Variant     | Amino acid exchange | Data extracted from... | Number of studies found* | <i>In vitro</i> or <i>in vivo</i> data available? | Study by | PMID                  | (Functional) implication?                                      |
|-------------|---------------------|------------------------|--------------------------|---------------------------------------------------|----------|-----------------------|----------------------------------------------------------------|
| rs121913557 | p.Val50Leu          | LitVar <sup>2</sup>    | 16                       | No                                                | NA       | NA                    | NA                                                             |
|             |                     | mc4r.org.uk            | 6                        | No                                                | NA       | NA                    | NA                                                             |
| rs2229616   | p.Val103Ile         | LitVar <sup>2</sup>    | 154                      | Yes                                               | 2        | 33761344              | Yes                                                            |
|             |                     |                        |                          |                                                   | 3        | 32059383              | Yes                                                            |
|             |                     |                        |                          |                                                   | 4        | 31002796              | Yes                                                            |
|             |                     |                        |                          |                                                   | 5        | 32916307              | Yes                                                            |
|             |                     |                        |                          |                                                   | 6        | 14973783              | No                                                             |
|             |                     |                        |                          |                                                   | 7        | 24385306              | Yes (if double mutant with Ser127Leu)                          |
|             |                     |                        |                          |                                                   | 8        | 16886960              | No                                                             |
|             |                     |                        |                          |                                                   | 9        | 23146882              | No (if single mutant)<br>Yes (if double mutant with Ser127Leu) |
|             | p.Val103Ile         | mc4r.org.uk            | 14                       | Yes                                               | 10       | 10078568              | No                                                             |
|             |                     |                        |                          |                                                   | 11       | 10585465              | No                                                             |
|             |                     |                        |                          |                                                   | 12       | 12970296              | No                                                             |
|             |                     |                        |                          |                                                   | 13       | 16752916              | Yes                                                            |
|             |                     |                        |                          |                                                   | 14       | 22106157              | No                                                             |
|             |                     |                        |                          |                                                   | 9        | 23146882 <sup>a</sup> | No (if single mutant)<br>Yes (if double mutant with Ser127Leu) |
|             |                     |                        |                          |                                                   | 7        | 24385306 <sup>a</sup> | Yes (if double mutant with Ser127Leu)                          |
|             |                     |                        |                          |                                                   | 2        | 33761344 <sup>a</sup> | Yes                                                            |

|               |             |                     |    |     |    |                       |                          |
|---------------|-------------|---------------------|----|-----|----|-----------------------|--------------------------|
| rs13447329    | p.Thr112Met | LitVar <sup>2</sup> | 31 | Yes | 9  | 23146882              | No                       |
|               |             |                     |    |     | 15 | 25332687              | Yes                      |
|               |             |                     |    |     | 16 | 16030156              | No                       |
|               |             |                     |    |     | 17 | 14764818              | No                       |
|               |             | mc4r.org.uk         | 22 | Yes | 10 | 10078568              | No                       |
|               |             |                     |    |     | 13 | 16752916              | Yes                      |
|               |             |                     |    |     | 9  | 23146882 <sup>a</sup> | No                       |
|               |             |                     |    |     | 18 | 12690102              | Yes                      |
|               |             |                     |    |     | 12 | 12970296              | no                       |
| rs13447331    | p.Ser127Leu | LitVar <sup>2</sup> | 40 | Yes | 17 | 14764818 <sup>a</sup> | No                       |
|               |             |                     |    |     | 3  | 32059383              | Yes                      |
|               |             |                     |    |     | 7  | 24385306              | Yes                      |
|               |             |                     |    |     | 17 | 14764818              | Yes                      |
|               |             |                     |    |     | 19 | 19298524              | Yes                      |
|               |             |                     |    |     | 20 | 30048591              | Yes                      |
|               |             |                     |    |     | 21 | 17668051              | Yes                      |
|               |             |                     |    |     | 22 | 23791567              | Yes                      |
|               |             | mc4r.org.uk         | 15 | Yes | 23 | 17590021              | Yes                      |
|               |             |                     |    |     | 24 | 12499395              | Yes                      |
|               |             |                     |    |     | 21 | 17668051 <sup>a</sup> | Yes                      |
|               |             |                     |    |     | 7  | 24385306 <sup>a</sup> | Yes                      |
|               |             |                     |    |     | 9  | 23146882              | Yes (for double mutants) |
|               |             |                     |    |     | 12 | 12970296              | Yes                      |
|               |             |                     |    |     | 13 | 16752916              | No                       |
|               |             |                     |    |     | 19 | 19298524 <sup>a</sup> | Yes                      |
|               |             |                     |    |     | 17 | 14764818              | No                       |
| novel variant | p.Tyr153Tyr | LitVar <sup>2</sup> | 0  | No  | NA | NA                    | NA                       |
|               |             | mc4r.org.uk         | 1  | No  | NA | NA                    | NA                       |
| no rsID       | p.Val193Val | LitVar <sup>2</sup> | 1  | No  | NA | NA                    | NA                       |
|               |             | mc4r.org.uk         | 1  | No  | NA | NA                    | NA                       |
| rs13447338    | p.Leu211fsX | LitVar <sup>2</sup> | 2  | Yes | 12 | 12970296              | Yes                      |
|               |             | mc4r.org.uk         | 1  | No  | NA | NA                    | NA                       |
| rs52820871    | p.Ile251Leu | LitVar <sup>2</sup> | 85 | Yes | 2  | 33761344              | Yes                      |

|  |  |             |    |     |    |                       |     |
|--|--|-------------|----|-----|----|-----------------------|-----|
|  |  |             |    |     | 4  | 31002796              | Yes |
|  |  |             |    |     | 9  | 23146882              | No  |
|  |  |             |    |     | 25 | 23251400              | Yes |
|  |  |             |    |     | 26 | 16553946              | No  |
|  |  |             |    |     | 7  | 24385306              | No  |
|  |  | mc4r.org.uk | 17 | Yes | 12 | 12970296              | No  |
|  |  |             |    |     | 13 | 16752916              | Yes |
|  |  |             |    |     | 14 | 22106157              | No  |
|  |  |             |    |     | 9  | 23146882 <sup>a</sup> | No  |
|  |  |             |    |     | 2  | 33761344 <sup>a</sup> | Yes |

All previously published studies regarding the here detected variants located in *MC4R* were either extracted from LitVar<sup>2</sup> (<sup>1</sup>) or the mc4r.org.uk website. The number of studies reported solely represents all studies found by the tools/website. It does not imply that the relevant variant, allele, consequence or phenotype was referred to in the respective publications (\*). A functional implication was given if at least one of parameters analysed in the studies was altered. Overlaps between the output of LitVar<sup>2</sup> and the website are possible and marked with <sup>a</sup>. For certain variants no data was available (NA). The complete output of LitVar<sup>2</sup> and www.mc4r.org.uk can be found in Supplementary Table 4. NA: not available. PMID: PubMedID.

**Supplementary Table 4: Output of LitVar<sup>2</sup>.**

| Gene       | Variant     | Number of studies found | PMID     | Title                                                                                                                                                                                             |
|------------|-------------|-------------------------|----------|---------------------------------------------------------------------------------------------------------------------------------------------------------------------------------------------------|
| <b>LEP</b> | rs201523306 | 0                       | -        | -                                                                                                                                                                                                 |
|            | rs133065017 | 13                      | 33941261 | Association of apolipoprotein B XbaI (rs693) polymorphism and gallstone disease risk based on a comprehensive analysis                                                                            |
|            |             |                         | 33233816 | The Genetic Basis of Obesity and Related Metabolic Diseases in Humans and Companion Animals                                                                                                       |
|            |             |                         | 30467071 | Role of rs670 variant of APOA1 gene on metabolic response after a high fat vs. a low fat hypocaloric diets in obese human subjects.                                                               |
|            |             |                         | 29974678 | A likely pathogenic variant putatively affecting splicing of PIGA identified in a multiple congenital anomalies hypotonia-seizures syndrome 2 (MCAHS2) family pedigree via whole-exome sequencing |
|            |             |                         | 28953935 | Association of MTTP gene variants with pediatric NAFLD: A candidate-gene-based analysis of single nucleotide variations in obese children                                                         |
|            |             |                         | 28404951 | Search for rare protein altering variants influencing susceptibility to multiple myeloma                                                                                                          |
|            |             |                         | 26523220 | Correlational studies on insulin resistance and leptin gene polymorphisms in peritoneal dialysis patients                                                                                         |
|            |             |                         | 25668207 | Genetic Investigation of Bisphosphonate-Related Osteonecrosis of Jaw (BRONJ) via Whole Exome Sequencing and Bioinformatics                                                                        |
|            |             |                         | 25310821 | A Genome-Wide Association Study Identifies Potential Susceptibility Loci for Hirschsprung Disease                                                                                                 |
|            |             |                         | 24219164 | Effect of a poly(ADP-ribose) polymerase-1 inhibitor against esophageal squamous cell carcinoma cell lines                                                                                         |
|            |             |                         | 23026132 | Resistance to antidepressant treatment is associated with polymorphisms in the leptin gene, decreased leptin mRNA expression, and decreased leptin serum levels                                   |
|            |             |                         | 20232565 | Identification of leptin gene variants in school children with early onset obesity.                                                                                                               |
|            |             |                         | 18997673 | Functional consequences of the human leptin receptor (LEPR) Q223R transversion                                                                                                                    |

|  |                         |    |          |                                                                                                                                                                                                                                                                   |
|--|-------------------------|----|----------|-------------------------------------------------------------------------------------------------------------------------------------------------------------------------------------------------------------------------------------------------------------------|
|  | no rsID<br>(p.Ser91Ser) | 1  | 9857981  | No evidence for involvement of the leptin gene in anorexia nervosa, bulimia nervosa, underweight or early onset extreme obesity: identification of two novel mutations in the coding sequence and a novel polymorphism in the leptin gene linked upstream region. |
|  | rs17151919              | 16 | 34642196 | Infant feeding, appetite and satiety regulation, and adiposity during infancy: a study design and protocol of the 'MAS-Lactancia' birth cohort                                                                                                                    |
|  |                         |    | 34594363 | Suggestive Evidence for Causal Effect of Leptin Levels on Risk for Anorexia Nervosa: Results of a Mendelian Randomization Study                                                                                                                                   |
|  |                         |    | 33631239 | ADIPOQ and LEP variants on asthma and atopy: Genetic association modified by overweight.                                                                                                                                                                          |
|  |                         |    | 33561332 | Associations between gene polymorphisms and selected meat traits in cattle : A review                                                                                                                                                                             |
|  |                         |    | 32917775 | Genetic Studies of Leptin Concentrations Implicate Leptin in the Regulation of Early Adiposity.                                                                                                                                                                   |
|  |                         |    | 30937429 | An enhanced workflow for variant interpretation in UniProtKB/Swiss-Prot improves consistency and reuse in ClinVar                                                                                                                                                 |
|  |                         |    | 28542631 | Concordance of bioactive vs. total immunoreactive serum leptin levels in children with severe early onset obesity                                                                                                                                                 |
|  |                         |    | 28436986 | Adiposity Amplifies the Genetic Risk of Fatty Liver Disease Conferred by Multiple Loci                                                                                                                                                                            |
|  |                         |    | 26659599 | Reproducible Analysis of Post-Translational Modifications in Proteomes:Application to Human Mutations                                                                                                                                                             |
|  |                         |    | 24349080 | Mechanistic Phenotypes: An Aggregative Phenotyping Strategy to Identify Disease Mechanisms Using GWAS Data                                                                                                                                                        |
|  |                         |    | 23760429 | Association between polymorphisms in leptin, leptin receptor, and beta-adrenergic receptor genes and bone mineral density in postmenopausal Korean women.                                                                                                         |
|  |                         |    | 23033454 | Variation in genes related to obesity, weight and weight change and risk of contralateral breast cancer in the WECARE Study population                                                                                                                            |
|  |                         |    | 23026132 | Resistance to antidepressant treatment is associated with polymorphisms in the leptin gene, decreased leptin mRNA expression, and decreased leptin serum levels                                                                                                   |
|  |                         |    | 22614171 | Appetite regulation genes are associated with body mass index in black South African adolescents: a genetic association study                                                                                                                                     |

|             |             |    |          |                                                                                                                                                                                                                              |
|-------------|-------------|----|----------|------------------------------------------------------------------------------------------------------------------------------------------------------------------------------------------------------------------------------|
|             |             |    | 21773001 | Variations in Adipokine Genes AdipoQ, Lep, and LepR are Associated with Risk for Obesity-Related Metabolic Disease: The Modulatory Role of Gene-Nutrient Interactions                                                        |
|             |             |    | 20642810 | Candidate Genes from Molecular Pathways Related to Appetite Regulatory Neural Network and Adipocyte Homeostasis and Obesity: the Coronary Artery Risk Development in Young Adults (CARDIA) Study                             |
| <b>MC4R</b> | rs121913557 | 16 | 32952152 | Evaluation of the MC4R gene across eMERGE network identifies many unreported obesity-associated variants                                                                                                                     |
|             |             |    | 31855179 | Common activation mechanism of class A GPCRs                                                                                                                                                                                 |
|             |             |    | 31358043 | A validated single-cell-based strategy to identify diagnostic and therapeutic targets in complex diseases                                                                                                                    |
|             |             |    | 30665703 | Assessing the Pathogenicity, Penetrance, and Expressivity of Putative Disease-Causing Variants in a Population Setting                                                                                                       |
|             |             |    | 29031731 | Evaluation of a melanocortin-4 receptor (MC4R) agonist (Setmelanotide) in MC4R deficiency                                                                                                                                    |
|             |             |    | 28433713 | Biased Signaling at Neural Melanocortin Receptors in Regulation of Energy Homeostasis                                                                                                                                        |
|             |             |    | 26986070 | Characterization of Disease-Associated Mutations in Human Transmembrane Proteins                                                                                                                                             |
|             |             |    | 26229975 | How genetic errors in GPCRs affect their function: Possible therapeutic strategies                                                                                                                                           |
|             |             |    | 26167768 | An siRNA-based functional genomics screen for the identification of regulators of ciliogenesis and ciliopathy genes                                                                                                          |
|             |             |    | 26147798 | The Use of Non-Variant Sites to Improve the Clinical Assessment of Whole-Genome Sequence Data                                                                                                                                |
|             |             |    | 25332687 | Defect in MAPK Signaling As a Cause for Monogenic Obesity Caused By Inactivating Mutations in the Melanocortin-4 Receptor Gene                                                                                               |
|             |             |    | 22817722 | Pharmacological chaperones increase the cell-surface expression of intracellularly retained mutants of the melanocortin 4 receptor with unique rescuing efficacy profiles.                                                   |
|             |             |    | 20462274 | Pharmacological Characterization of 30 Human Melanocortin-4 Receptor Polymorphisms with the Endogenous Proopiomelanocortin Derived Agonists, Synthetic Agonists, and the Endogenous Agouti-Related Protein (AGRP) Antagonist |



|  |           |     |          |                                                                                                                                                                      |
|--|-----------|-----|----------|----------------------------------------------------------------------------------------------------------------------------------------------------------------------|
|  |           |     | 19417090 | In silico mutagenesis: a case study of the melanocortin 4 receptor                                                                                                   |
|  |           |     | 12959994 | Functional characterization of melanocortin-4 receptor mutations associated with childhood obesity.                                                                  |
|  |           |     | 11487744 | Mutational analysis of melanocortin-4 receptor, agouti-related protein, and alpha-melanocyte-stimulating hormone genes in severely obese children.                   |
|  | rs2229616 | 154 | 9267995  | Molecular screening of the human melanocortin-4 receptor gene: identification of a missense variant showing no association with obesity, plasma glucose, or insulin. |
|  |           |     | 35095762 | Weight and Glycemic Control Outcomes of Bariatric Surgery and Pharmacotherapy in Patients With Melanocortin-4 Receptor Deficiency                                    |
|  |           |     | 34900785 | Effect of dietary fat intake and genetic risk on glucose and insulin-related traits in Brazilian young adults                                                        |
|  |           |     | 34683180 | A Clinical-Genetic Score for Predicting Weight Loss after Bariatric Surgery: The OBEGEN Study                                                                        |
|  |           |     | 34414523 | FTO-rs9939609 Polymorphism is a Predictor of Future Type 2 Diabetes: A Population-Based Prospective Study                                                            |
|  |           |     | 34315947 | Association of CNR1 and INSIG2 polymorphisms with antipsychotics-induced weight gain: a prospective nested case-control study                                        |
|  |           |     | 34045736 | Loss of function mutations in the melanocortin 4 receptor in a UK birth cohort                                                                                       |
|  |           |     | 33807560 | A Systematic Review of Genetic Polymorphisms Associated with Binge Eating Disorder.                                                                                  |
|  |           |     | 33761344 | Human MC4R variants affect endocytosis, trafficking and dimerization revealing multiple cellular mechanisms involved in weight regulation                            |
|  |           |     | 33498618 | Interaction between Vitamin D-Related Genetic Risk Score and Carbohydrate Intake on Body Fat Composition: A Study in Southeast Asian Minangkabau Women               |
|  |           |     | 33362866 | Identification of a Rare and Potential Pathogenic MC4R Variant in a Brazilian Patient With Adulthood-Onset Severe Obesity                                            |
|  |           |     | 33233816 | The Genetic Basis of Obesity and Related Metabolic Diseases in Humans and Companion Animals                                                                          |
|  |           |     | 33066636 | Statistical and Machine-Learning Analyses in Nutritional Genomics Studies                                                                                            |
|  |           |     | 33045981 | Interaction between the genetic risk score and dietary protein intake on cardiometabolic traits in Southeast Asian                                                   |

|  |  |  |          |                                                                                                                                                                                              |
|--|--|--|----------|----------------------------------------------------------------------------------------------------------------------------------------------------------------------------------------------|
|  |  |  | 32952152 | Evaluation of the MC4R gene across eMERGE network identifies many unreported obesity-associated variants                                                                                     |
|  |  |  | 32921795 | Obesity treatment effect in Danish children and adolescents carrying Melanocortin-4 Receptor mutations                                                                                       |
|  |  |  | 32916307 | Mouse models for V103I and I251L gain of function variants of the human MC4R display decreased adiposity but are not protected against a hypercaloric diet                                   |
|  |  |  | 32665031 | PWAS: proteome-wide association study:linking genes and phenotypes by functional variation in proteins                                                                                       |
|  |  |  | 32605047 | Interaction between Metabolic Genetic Risk Score and Dietary Fatty Acid Intake on Central Obesity in a Ghanaian Population                                                                   |
|  |  |  | 32316318 | Metabolic Reprogramming in Health and Disease                                                                                                                                                |
|  |  |  | 32185475 | Melanocortin 4 receptor (MC4R) gene variants in children and adolescents having familial early-onset obesity: genetic and clinical characteristics                                           |
|  |  |  | 32114639 | Genetic determinants of gestational diabetes mellitus: a case-control study in two independent populations.                                                                                  |
|  |  |  | 32059383 | Differential Signaling Profiles of MC4R Mutations with Three Different Ligands                                                                                                               |
|  |  |  | 31947684 | The Effect Sizes of PPARgamma rs1801282, FTO rs9939609, and MC4R rs2229616 Variants on Type 2 Diabetes Mellitus Risk among the Western Saudi Population: A Cross-Sectional Prospective Study |
|  |  |  | 31890664 | A nutrigenetic approach for investigating the relationship between vitamin B12 status and metabolic traits in Indonesian women                                                               |
|  |  |  | 31492854 | Components of genetic associations across 2,138 phenotypes in the UK Biobank highlight adipocyte biology                                                                                     |
|  |  |  | 31484069 | Peptide/Receptor Co-evolution Explains the Lipolytic Function of the Neuropeptide TLQP-21                                                                                                    |
|  |  |  | 31358043 | A validated single-cell-based strategy to identify diagnostic and therapeutic targets in complex diseases                                                                                    |
|  |  |  | 31348498 | Voice break in boys:temporal relations with other pubertal milestones and likely causal effects of BMI                                                                                       |
|  |  |  | 31263163 | Genome-wide Association Study of Change in Fasting Glucose over time in 13,807 non-diabetic European Ancestry Individuals                                                                    |

|  |  |  |          |                                                                                                                                              |
|--|--|--|----------|----------------------------------------------------------------------------------------------------------------------------------------------|
|  |  |  | 31178821 | Association Between Premorbid Body Mass Index and Amyotrophic Lateral Sclerosis: Causal Inference Through Genetic Approaches                 |
|  |  |  | 31064983 | Pancreatic islet chromatin accessibility and conformation reveals distal enhancer networks of type 2 diabetes risk                           |
|  |  |  | 31048771 | Genetic Predisposition Impacts Clinical Changes in a Lifestyle Coaching Program                                                              |
|  |  |  | 31002796 | Human Gain-of-Function MC4R Variants Show Signaling Bias and Protect against Obesity                                                         |
|  |  |  | 30981838 | Genetic screening for MC4R gene identifies three novel mutations associated with severe familial obesity in a cohort of Spanish individuals. |
|  |  |  | 30937429 | An enhanced workflow for variant interpretation in UniProtKB/Swiss-Prot improves consistency and reuse in ClinVar                            |
|  |  |  | 30894629 | A reference collection of patient-derived cell line and xenograft models of proneural, classical and mesenchymal glioblastoma                |
|  |  |  | 30863132 | Identification of the MC4R start lost mutation in a morbidly obese Brazilian patient                                                         |
|  |  |  | 30840888 | APOBEC Mutagenesis and Copy-Number Alterations Are Drivers of Proteogenomic Tumor Evolution and Heterogeneity in Metastatic Thoracic Tumors  |
|  |  |  | 30650367 | Multiomic Profiling Identifies cis-Regulatory Networks Underlying Human Pancreatic beta Cell Identity and Function                           |
|  |  |  | 30300385 | A type 2 diabetes disease module with a high collective influence for Cdk2 and PTPLAD1 is localized in endosomes                             |
|  |  |  | 30256453 | Rare genetic variation in mitochondrial pathways influences the risk for Parkinson's disease                                                 |
|  |  |  | 30214008 | Whole genome sequencing identifies high-impact variants in well-known pharmacogenomic genes                                                  |
|  |  |  | 30134862 | Relevance of polymorphisms in MC4R and BDNF in short normal stature                                                                          |
|  |  |  | 30121879 | Genetics of Severe Obesity                                                                                                                   |
|  |  |  | 30068297 | Heterozygous versus homozygous phenotype caused by the same MC4R mutation: novel mutation affecting a large consanguineous kindred           |
|  |  |  | 30066661 | An update on obesity research pattern among adults in Malaysia: a scoping review                                                             |

|  |  |  |          |                                                                                                                                                                                                                                          |
|--|--|--|----------|------------------------------------------------------------------------------------------------------------------------------------------------------------------------------------------------------------------------------------------|
|  |  |  | 30032228 | Associations between Single Nucleotide Polymorphisms and Total Energy, Carbohydrate, and Fat Intakes: A Systematic Review                                                                                                                |
|  |  |  | 29970889 | Elucidating the genetic basis of social interaction and isolation                                                                                                                                                                        |
|  |  |  | 29966015 | Computational analyses of obesity associated loci generated by genome-wide association studies                                                                                                                                           |
|  |  |  | 29736163 | Genetic Aspects of Obesity                                                                                                                                                                                                               |
|  |  |  | 29679223 | Association between LEPR, FTO, MC4R, and PPARG-2 polymorphisms with obesity traits and metabolic phenotypes in school-aged children                                                                                                      |
|  |  |  | 29658973 | Searching for ancient balanced polymorphisms shared between Neanderthals and Modern Humans                                                                                                                                               |
|  |  |  | 28828082 | Impact of the Polymorphism Near MC4R (rs17782313) on Obesity- and Metabolic-Related Traits in Women Participating in an Aerobic Training Program                                                                                         |
|  |  |  | 28757201 | Continuity and Admixture in the Last Five Millennia of Levantine History from Ancient Canaanite and Present-Day Lebanese Genome Sequences                                                                                                |
|  |  |  | 28755272 | Polymorphism and methylation of the MC4R gene in obese and non-obese dogs                                                                                                                                                                |
|  |  |  | 28567303 | Whole-genome sequencing expands diagnostic utility and improves clinical management in paediatric medicine                                                                                                                               |
|  |  |  | 28440294 | Next-generation DNA sequencing identifies novel gene variants and pathways involved in specific language impairment                                                                                                                      |
|  |  |  | 28391526 | Trans-ethnic fine-mapping of genetic loci for body mass index in the diverse ancestral populations of the Population Architecture using Genomics and Epidemiology (PAGE) Study reveals evidence for multiple signals at established loci |
|  |  |  | 28105929 | A compendium of human genes regulating feeding behavior and body weight, its functional characterization and identification of GWAS genes involved in brain-specific PPI network                                                         |
|  |  |  | 27575456 | Multi-Variant Study of Obesity Risk Genes in African Americans: The Jackson Heart Study                                                                                                                                                  |
|  |  |  | 27270441 | Molecular analysis of urothelial cancer cell lines for modeling tumor biology and drug response                                                                                                                                          |
|  |  |  | 27013903 | Genetics and Epigenetics of Eating Disorders                                                                                                                                                                                             |

|  |  |  |          |                                                                                                                                                                                    |
|--|--|--|----------|------------------------------------------------------------------------------------------------------------------------------------------------------------------------------------|
|  |  |  | 26986070 | Characterization of Disease-Associated Mutations in Human Transmembrane Proteins                                                                                                   |
|  |  |  | 26828654 | Analysis of Genes Involved in Body Weight Regulation by Targeted Re-Sequencing                                                                                                     |
|  |  |  | 26788538 | Allelic variants of the Melanocortin 4 receptor (MC4R) gene in a South African study group                                                                                         |
|  |  |  | 26659599 | Reproducible Analysis of Post-Translational Modifications in Proteomes:Application to Human Mutations                                                                              |
|  |  |  | 26600159 | Genome-Wide Association Study Identifies That the ABO Blood Group System Influences Interleukin-10 Levels and the Risk of Clinical Events in Patients with Acute Coronary Syndrome |
|  |  |  | 26474449 | Practical Experience of the Application of a Weighted Burden Test to Whole Exome Sequence Data for Obesity and Schizophrenia                                                       |
|  |  |  | 26244670 | The prevalence of melanocortin-4 receptor gene mutations in Slovak obese children and adolescents.                                                                                 |
|  |  |  | 26229975 | How genetic errors in GPCRs affect their function: Possible therapeutic strategies                                                                                                 |
|  |  |  | 26167768 | An siRNA-based functional genomics screen for the identification of regulators of ciliogenesis and ciliopathy genes                                                                |
|  |  |  | 25919555 | [Mutation screening and function prediction of melanocortin-4 receptor gene in obese children].                                                                                    |
|  |  |  | 25905921 | XomAnnotate: Analysis of Heterogeneous and Complex Exome- A Step towards Translational Medicine                                                                                    |
|  |  |  | 25668207 | Genetic Investigation of Bisphosphonate-Related Osteonecrosis of Jaw (BRONJ) via Whole Exome Sequencing and Bioinformatics                                                         |
|  |  |  | 25579139 | Genetic & epigenetic approach to human obesity                                                                                                                                     |
|  |  |  | 25333361 | Exome Sequencing Is an Efficient Tool for Variant Late-Infantile Neuronal Ceroid Lipofuscinosis Molecular Diagnosis                                                                |
|  |  |  | 25032700 | NCI-60 Whole Exome Sequencing and Pharmacological CellMiner Analyses                                                                                                               |
|  |  |  | 24820477 | Genetic Association Study of Adiposity and Melanocortin-4 Receptor (MC4R) Common Variants: Replication and Functional Characterization of Non-Coding Regions                       |

|  |  |  |          |                                                                                                                                                                                         |
|--|--|--|----------|-----------------------------------------------------------------------------------------------------------------------------------------------------------------------------------------|
|  |  |  | 24705671 | Long-Term Weight-Loss in Gastric Bypass Patients Carrying Melanocortin 4 Receptor Variants                                                                                              |
|  |  |  | 24611737 | Novel variants in the MC4R and LEPR genes among severely obese children from the Iberian population.                                                                                    |
|  |  |  | 24518831 | Controversial association results for INSIG2 on body mass index may be explained by interactions with age and with MC4R.                                                                |
|  |  |  | 24385306 | The role of common and rare MC4R variants and FTO polymorphisms in extreme form of obesity.                                                                                             |
|  |  |  | 24276017 | Brain-Derived Neurotrophic Factor in Human Subjects with Function-Altering Melanocortin-4 Receptor Variants                                                                             |
|  |  |  | 24267414 | Impact of obesity-related genes in Spanish population                                                                                                                                   |
|  |  |  | 23996627 | Family of melanocortin receptor (MCR) genes in mammals:mutations, polymorphisms and phenotypic effects                                                                                  |
|  |  |  | 23819521 | Assessment of computational methods for predicting the effects of missense mutations in human cancers                                                                                   |
|  |  |  | 23505181 | The missense variation landscape of FTO, MC4R and TMEM18 in obese children of African ancestry                                                                                          |
|  |  |  | 23485949 | Polymorphic variants of neurotransmitter receptor genes may affect sexual function in aging males: data from the HALS study.                                                            |
|  |  |  | 23270367 | Mutation screen in the GWAS derived obesity gene SH2B1 including functional analyses of detected variants                                                                               |
|  |  |  | 23185251 | Melanocortin-4 Receptor Mutations and Polymorphisms Do Not Affect Weight Loss after Bariatric Surgery                                                                                   |
|  |  |  | 23101478 | Single nucleotide polymorphisms (SNPs) involved in insulin resistance, weight regulation, lipid metabolism and inflammation in relation to metabolic syndrome: an epidemiological study |
|  |  |  | 23049848 | Association between Common Polymorphism near the MC4R Gene and Obesity Risk: A Systematic Review and Meta-Analysis                                                                      |
|  |  |  | 23033454 | Variation in genes related to obesity, weight and weight change and risk of contralateral breast cancer in the WECARE Study population                                                  |
|  |  |  | 22989167 | Association of melanocortin-4 receptor gene polymorphisms with obesity-related parameters in Malaysian Malays.                                                                          |

|  |  |  |          |                                                                                                                                                                  |
|--|--|--|----------|------------------------------------------------------------------------------------------------------------------------------------------------------------------|
|  |  |  | 22822657 | Prevalence of melanocortin receptor 4 (MC4R) V103I gene variant and its association with obesity among the Kampar Health Clinic cohort, Perak, Malaysia.         |
|  |  |  | 22535570 | Is there a genetic cause of appetite loss?:an explorative study in 1,853 cancer patients                                                                         |
|  |  |  | 22473907 | P-selectin genotype is associated with the development of cancer cachexia                                                                                        |
|  |  |  | 22447289 | Loss-of-function mutations in MC4R are very rare in the Greek severely obese adult population.                                                                   |
|  |  |  | 22310352 | Genetic association study between antipsychotic-induced weight gain and the melanocortin-4 receptor gene.                                                        |
|  |  |  | 22106157 | Greater Impact of Melanocortin-4 Receptor Deficiency on Rates of Growth and Risk of Type 2 Diabetes During Childhood Compared With Adulthood in Pima Indians     |
|  |  |  | 22043165 | Genetics of Obesity: What have we Learned?                                                                                                                       |
|  |  |  | 22043164 | Molecular Basis of Obesity: Current Status and Future Prospects                                                                                                  |
|  |  |  | 22020349 | Polymorphisms of INSIG2, MC4R, and LEP are associated with obesity- and metabolic-related traits in schizophrenic patients.                                      |
|  |  |  | 21976721 | The MC4R(I251L) allele is associated with better metabolic status and more weight loss after gastric bypass surgery.                                             |
|  |  |  | 21934689 | Is there a genetic cause for cancer cachexia? - a clinical validation study in 1797 patients                                                                     |
|  |  |  | 21921652 | Evaluation of the obesity genes FTO and MC4R and the type 2 diabetes mellitus gene TCF7L2 for contribution to stroke risk: The Mannheim-Heidelberg Stroke Study. |
|  |  |  | 21750520 | Implication of European-derived adiposity loci in African Americans                                                                                              |
|  |  |  | 21404042 | Missense mutations and polymorphisms of the MC4R gene in Polish obese children and adolescents in relation to the relative body mass index                       |
|  |  |  | 21295023 | The genetic epidemiology of melanocortin 4 receptor variants.                                                                                                    |
|  |  |  | 21085626 | Investigation of a Genome Wide Association Signal for Obesity: Synthetic Association and Haplotype Analyses at the Melanocortin 4 Receptor Gene Locus            |
|  |  |  | 20935630 | Association analyses of 249,796 individuals reveal eighteen new loci associated with body mass index                                                             |

|  |  |  |          |                                                                                                                                                                                                                              |
|--|--|--|----------|------------------------------------------------------------------------------------------------------------------------------------------------------------------------------------------------------------------------------|
|  |  |  | 20682687 | Common Variants in 40 Genes Assessed for Diabetes Incidence and Response to Metformin and Lifestyle Intervention in the Diabetes Prevention Program                                                                          |
|  |  |  | 20587078 | Genomic insights into early-onset obesity                                                                                                                                                                                    |
|  |  |  | 20530052 | Melanocortin-4 receptor polymorphisms in Turkish pediatric obese patients.                                                                                                                                                   |
|  |  |  | 20462274 | Pharmacological Characterization of 30 Human Melanocortin-4 Receptor Polymorphisms with the Endogenous Proopiomelanocortin Derived Agonists, Synthetic Agonists, and the Endogenous Agouti-Related Protein (AGRP) Antagonist |
|  |  |  | 20406574 | Melanocortin-4 receptor gene variants in Chilean families: association with childhood obesity and eating behavior.                                                                                                           |
|  |  |  | 20127379 | From monogenic to polygenic obesity: recent advances                                                                                                                                                                         |
|  |  |  | 20092643 | Large effects on body mass index and insulin resistance of fat mass and obesity associated gene (FTO) variants in patients with polycystic ovary syndrome (PCOS)                                                             |
|  |  |  | 20054160 | Polygenic obesity in humans.                                                                                                                                                                                                 |
|  |  |  | 20033240 | Eating disorders: the current status of molecular genetic research                                                                                                                                                           |
|  |  |  | 20004082 | Update on Melanocortin Interventions for Cachexia: Progress Toward Clinical Application                                                                                                                                      |
|  |  |  | 19696756 | Association of the MC4R V103I polymorphism with obesity: a Chinese case-control study and meta-analysis in 55,195 individuals.                                                                                               |
|  |  |  | 19417090 | In silico mutagenesis: a case study of the melanocortin 4 receptor                                                                                                                                                           |
|  |  |  | 19284607 | Prevalence of pathogenetic MC4R mutations in Italian children with early Onset obesity, tall stature and familial history of obesity                                                                                         |
|  |  |  | 19073769 | Variants Near MC4R Are Associated With Obesity and Influence Obesity-Related Quantitative Traits in a Population of Middle-Aged People: Studies of 14,940 Danes                                                              |
|  |  |  | 19046411 | Obesity genes: so close and yet so far...                                                                                                                                                                                    |
|  |  |  | 18835933 | Lower Metabolic Rate in Individuals Heterozygous for Either a Frameshift or a Functional Missense MC4R Variant                                                                                                               |
|  |  |  | 18779298 | Association of the melanocortin-4 receptor V103I polymorphism with dietary intake in severely obese individuals                                                                                                              |



|  |  |  |          |                                                                                                                                                   |
|--|--|--|----------|---------------------------------------------------------------------------------------------------------------------------------------------------|
|  |  |  | 18559663 | Prevalence of Melanocortin-4 Receptor Deficiency in Europeans and Their Age-Dependent Penetrance in Multigenerational Pedigrees                   |
|  |  |  | 18454148 | Common variants near MC4R are associated with fat mass, weight and risk of obesity                                                                |
|  |  |  | 18377640 | Val103Ile polymorphism of the melanocortin-4 receptor gene (MC4R) in cancer cachexia                                                              |
|  |  |  | 18239646 | Association of the MC4R V103I polymorphism with the metabolic syndrome: the KORA Study.                                                           |
|  |  |  | 17587397 | Genetic variation and decreased risk for obesity in the Atherosclerosis Risk in Communities Study.                                                |
|  |  |  | 17519222 | Non-synonymous polymorphisms in melanocortin-4 receptor protect against obesity: the two facets of a Janus obesity gene.                          |
|  |  |  | 17418015 | [Association between melanocortin 4 receptor gene polymorphisms and obesity].                                                                     |
|  |  |  | 17356525 | The V103I polymorphism of the MC4R gene and obesity: population based studies and meta-analysis of 29 563 individuals                             |
|  |  |  | 17286227 | A novel non-synonymous mutation in the melanocortin-4 receptor gene (MC4R) in a 2-year-old Austrian girl with extreme obesity.                    |
|  |  |  | 17196040 | Unraveling the Genetics of Human Obesity                                                                                                          |
|  |  |  | 17185898 | Several mutations in the melanocortin 4 receptor gene are associated with obesity in Chinese children and adolescents.                            |
|  |  |  | 17072869 | Prevalence and functionality of paucimorphic and private MC4R mutations in a large, unselected European British population, scanned by meltMADGE. |
|  |  |  | 16886960 | Identification and functional characterization of three novel human melanocortin-4 receptor gene variants in an obese Chinese population.         |
|  |  |  | 16278267 | The 103I variant of the melanocortin 4 receptor is associated with low serum triglyceride levels.                                                 |
|  |  |  | 16231025 | Screening for melanocortin-4 receptor mutations in a cohort of Belgian morbidly obese adults and children.                                        |
|  |  |  | 15805150 | Association of the 103I MC4R allele with decreased body mass in 7937 participants of two population based surveys.                                |
|  |  |  | 15292469 | The Val103Ile polymorphism of melanocortin-4 receptor regulates energy expenditure and weight gain.                                               |

|  |            |    |          |                                                                                                                                                                 |
|--|------------|----|----------|-----------------------------------------------------------------------------------------------------------------------------------------------------------------|
|  |            |    | 15037865 | Binge-eating episodes are not characteristic of carriers of melanocortin-4 receptor gene mutations.                                                             |
|  |            |    | 14973783 | Melanocortin-4 receptor gene variant I103 is negatively associated with obesity.                                                                                |
|  |            |    | 14764818 | Identification and characterization of melanocortin-4 receptor gene mutations in morbidly obese finnish children and adults.                                    |
|  |            |    | 14764812 | Genetic screening for melanocortin-4 receptor mutations in a cohort of Italian obese patients: description and functional characterization of a novel mutation. |
|  |            |    | 12629567 | A novel nonsense mutation in the melanocortin-4 receptor associated with obesity in a Spanish population.                                                       |
|  |            |    | 11692184 | A missense mutation in the human melanocortin-4 receptor gene in relation to abdominal obesity and salivary cortisol.                                           |
|  |            |    | 11246450 | Molecular scanning for mutations in the melanocortin-4 receptor gene in obese/diabetic Japanese.                                                                |
|  |            |    | 10199800 | Several mutations in the melanocortin-4 receptor gene including a nonsense and a frameshift mutation associated with dominantly inherited obesity in humans.    |
|  | rs13447329 | 31 | 34045736 | Loss of function mutations in the melanocortin 4 receptor in a UK birth cohort                                                                                  |
|  |            |    | 33202557 | The Melanocortin System behind the Dysfunctional Eating Behaviors                                                                                               |
|  |            |    | 32921795 | Obesity treatment effect in Danish children and adolescents carrying Melanocortin-4 Receptor mutations                                                          |
|  |            |    | 32153512 | Rare Variants in Genes Linked to Appetite Control and Hypothalamic Development in Early-Onset Severe Obesity                                                    |
|  |            |    | 31646011 | The role of GPCRs in bone diseases and dysfunctions                                                                                                             |
|  |            |    | 31088516 | Identification of genetic association between cardiorespiratory fitness and the trainability genes in childhood acute lymphoblastic leukemia survivors          |
|  |            |    | 30134862 | Relevance of polymorphisms in MC4R and BDNF in short normal stature                                                                                             |
|  |            |    | 28839234 | Identification of NCAN as a candidate gene for developmental dyslexia                                                                                           |
|  |            |    | 28433713 | Biased Signaling at Neural Melanocortin Receptors in Regulation of Energy Homeostasis                                                                           |
|  |            |    | 27706562 | Prevalence of mutations in LEP, LEPR, and MC4R genes in individuals with severe obesity.                                                                        |

|  |  |  |          |                                                                                                                                                       |
|--|--|--|----------|-------------------------------------------------------------------------------------------------------------------------------------------------------|
|  |  |  | 26986070 | Characterization of Disease-Associated Mutations in Human Transmembrane Proteins                                                                      |
|  |  |  | 26659599 | Reproducible Analysis of Post-Translational Modifications in Proteomes:Application to Human Mutations                                                 |
|  |  |  | 26229975 | How genetic errors in GPCRs affect their function: Possible therapeutic strategies                                                                    |
|  |  |  | 25332687 | Defect in MAPK Signaling As a Cause for Monogenic Obesity Caused By Inactivating Mutations in the Melanocortin-4 Receptor Gene                        |
|  |  |  | 25188385 | A Probabilistic Model to Predict Clinical Phenotypic Traits from Genome Sequencing                                                                    |
|  |  |  | 25032700 | NCI-60 Whole Exome Sequencing and Pharmacological CellMiner Analyses                                                                                  |
|  |  |  | 24705671 | Long-Term Weight-Loss in Gastric Bypass Patients Carrying Melanocortin 4 Receptor Variants                                                            |
|  |  |  | 23819521 | Assessment of computational methods for predicting the effects of missense mutations in human cancers                                                 |
|  |  |  | 23146882 | Clinical and functional relevance of melanocortin-4 receptor variants in obese German children.                                                       |
|  |  |  | 22447289 | Loss-of-function mutations in MC4R are very rare in the Greek severely obese adult population.                                                        |
|  |  |  | 21404042 | Missense mutations and polymorphisms of the MC4R gene in Polish obese children and adolescents in relation to the relative body mass index            |
|  |  |  | 21085626 | Investigation of a Genome Wide Association Signal for Obesity: Synthetic Association and Haplotype Analyses at the Melanocortin 4 Receptor Gene Locus |
|  |  |  | 19417090 | In silico mutagenesis: a case study of the melanocortin 4 receptor                                                                                    |
|  |  |  | 18974781 | Cataloging Coding Sequence Variations in Human Genome Databases                                                                                       |
|  |  |  | 18559663 | Prevalence of Melanocortin-4 Receptor Deficiency in Europeans and Their Age-Dependent Penetrance in Multigenerational Pedigrees                       |
|  |  |  | 17072869 | Prevalence and functionality of paucimorphic and private MC4R mutations in a large, unselected European British population, scanned by meltMADGE.     |
|  |  |  | 16231025 | Screening for melanocortin-4 receptor mutations in a cohort of Belgian morbidly obese adults and children.                                            |

|  |            |    |          |                                                                                                                                                                                                                 |
|--|------------|----|----------|-----------------------------------------------------------------------------------------------------------------------------------------------------------------------------------------------------------------|
|  |            |    | 16030156 | Functional analyses of melanocortin-4 receptor mutations identified from patients with binge eating disorder and nonobese or obese subjects.                                                                    |
|  |            |    | 14764818 | Identification and characterization of melanocortin-4 receptor gene mutations in morbidly obese finnish children and adults.                                                                                    |
|  |            |    | 10903343 | Dominant and recessive inheritance of morbid obesity associated with melanocortin 4 receptor deficiency.                                                                                                        |
|  |            |    | 10078568 | Identification and functional analysis of novel human melanocortin-4 receptor variants.                                                                                                                         |
|  | rs13447331 | 40 | 34045736 | Loss of function mutations in the melanocortin 4 receptor in a UK birth cohort                                                                                                                                  |
|  |            |    | 32952152 | Evaluation of the MC4R gene across eMERGE network identifies many unreported obesity-associated variants                                                                                                        |
|  |            |    | 32384097 | Identifying underlying medical causes of pediatric obesity: Results of a systematic diagnostic approach in a pediatric obesity center                                                                           |
|  |            |    | 32316318 | Metabolic Reprogramming in Health and Disease                                                                                                                                                                   |
|  |            |    | 32059383 | Differential Signaling Profiles of MC4R Mutations with Three Different Ligands                                                                                                                                  |
|  |            |    | 31855179 | Common activation mechanism of class A GPCRs                                                                                                                                                                    |
|  |            |    | 31358043 | A validated single-cell-based strategy to identify diagnostic and therapeutic targets in complex diseases                                                                                                       |
|  |            |    | 30926952 | Heterozygous rare genetic variants in non-syndromic early-onset obesity                                                                                                                                         |
|  |            |    | 30048591 | Insights into the Allosteric Mechanism of Setmelanotide (RM-493) as a Potent and First-in-Class Melanocortin-4 Receptor (MC4R) Agonist To Treat Rare Genetic Disorders of Obesity through an in Silico Approach |
|  |            |    | 30019023 | Structural Biology Helps Interpret Variants of Uncertain Significance in Genes Causing Endocrine and Metabolic Disorders                                                                                        |
|  |            |    | 29273807 | Protein-altering variants associated with body mass index implicate pathways that control energy intake and expenditure underpinning obesity                                                                    |
|  |            |    | 28719003 | Mutation intolerant genes and targets of FMRP are enriched for nonsynonymous alleles in schizophrenia                                                                                                           |
|  |            |    | 28404951 | Search for rare protein altering variants influencing susceptibility to multiple myeloma                                                                                                                        |
|  |            |    | 26986070 | Characterization of Disease-Associated Mutations in Human Transmembrane Proteins                                                                                                                                |

|  |  |  |          |                                                                                                                                                       |
|--|--|--|----------|-------------------------------------------------------------------------------------------------------------------------------------------------------|
|  |  |  | 26740555 | Exome arrays capture polygenic rare variant contributions to schizophrenia                                                                            |
|  |  |  | 26659599 | Reproducible Analysis of Post-Translational Modifications in Proteomes:Application to Human Mutations                                                 |
|  |  |  | 26244670 | The prevalence of melanocortin-4 receptor gene mutations in Slovak obese children and adolescents.                                                    |
|  |  |  | 26238496 | Age of obesity onset in MC4R mutation carriers.                                                                                                       |
|  |  |  | 26229975 | How genetic errors in GPCRs affect their function: Possible therapeutic strategies                                                                    |
|  |  |  | 26167768 | An siRNA-based functional genomics screen for the identification of regulators of ciliogenesis and ciliopathy genes                                   |
|  |  |  | 26147798 | The Use of Non-Variant Sites to Improve the Clinical Assessment of Whole-Genome Sequence Data                                                         |
|  |  |  | 26047380 | Melanocortin-4 receptor gene mutations in obese Slovak children.                                                                                      |
|  |  |  | 24611737 | Novel variants in the MC4R and LEPR genes among severely obese children from the Iberian population.                                                  |
|  |  |  | 24385306 | The role of common and rare MC4R variants and FTO polymorphisms in extreme form of obesity.                                                           |
|  |  |  | 23819521 | Assessment of computational methods for predicting the effects of missense mutations in human cancers                                                 |
|  |  |  | 23791567 | Activation of MAPK by inverse agonists in six naturally occurring constitutively active mutant human melanocortin-4 receptors.                        |
|  |  |  | 22447289 | Loss-of-function mutations in MC4R are very rare in the Greek severely obese adult population.                                                        |
|  |  |  | 21404042 | Missense mutations and polymorphisms of the MC4R gene in Polish obese children and adolescents in relation to the relative body mass index            |
|  |  |  | 21341504 | [Genetic variations in energy balance regulation].                                                                                                    |
|  |  |  | 21085626 | Investigation of a Genome Wide Association Signal for Obesity: Synthetic Association and Haplotype Analyses at the Melanocortin 4 Receptor Gene Locus |
|  |  |  | 20507906 | PhenoHM: human-mouse comparative phenome-genome server                                                                                                |
|  |  |  | 19298524 | Functional characterization and pharmacological rescue of melanocortin-4 receptor mutations identified from obese patients                            |
|  |  |  | 19284607 | Prevalence of pathogenetic MC4R mutations in Italian children with early Onset obesity, tall stature and familial history of obesity                  |

|  |                          |    |          |                                                                                                                                                              |
|--|--------------------------|----|----------|--------------------------------------------------------------------------------------------------------------------------------------------------------------|
|  |                          |    | 19139070 | Genome-wide analysis to predict protein sequence variations that change phosphorylation sites or their corresponding kinases                                 |
|  |                          |    | 18974781 | Cataloging Coding Sequence Variations in Human Genome Databases                                                                                              |
|  |                          |    | 18559663 | Prevalence of Melanocortin-4 Receptor Deficiency in Europeans and Their Age-Dependent Penetrance in Multigenerational Pedigrees                              |
|  |                          |    | 17668051 | Engineering the Melanocortin-4 Receptor to Control Constitutive and Ligand-Mediated Gs Signaling In Vivo                                                     |
|  |                          |    | 17590021 | Peptide and small molecules rescue the functional activity and agonist potency of dysfunctional human melanocortin-4 receptor polymorphisms.                 |
|  |                          |    | 17579204 | Melanocortin 4 receptor mutations in obese Czech children: studies of prevalence, phenotype development, weight reduction response, and functional analysis. |
|  |                          |    | 14764818 | Identification and characterization of melanocortin-4 receptor gene mutations in morbidly obese finnish children and adults.                                 |
|  | novel<br>(p.Tyr153Tyr)   | 0  | -        | -                                                                                                                                                            |
|  | no rsID<br>(p.Val193Val) | 1  | 10199800 | Several mutations in the melanocortin-4 receptor gene including a nonsense and a frameshift mutation associated with dominantly inherited obesity in humans. |
|  | rs13447338               | 2  | 33362866 | Identification of a Rare and Potential Pathogenic MC4R Variant in a Brazilian Patient With Adulthood-Onset Severe Obesity                                    |
|  |                          |    | 17941900 | Novel melanocortin 4 receptor gene mutations in severely obese children.                                                                                     |
|  | rs52820871               | 85 | 35328759 | Neurohormonal Changes in the Gut-Brain Axis and Underlying Neuroendocrine Mechanisms following Bariatric Surgery                                             |
|  |                          |    | 34887725 | Role of the Autonomic Nervous System in Mechanism of Energy and Glucose Regulation Post Bariatric Surgery                                                    |
|  |                          |    | 34683180 | A Clinical-Genetic Score for Predicting Weight Loss after Bariatric Surgery: The OBEGEN Study                                                                |
|  |                          |    | 34045736 | Loss of function mutations in the melanocortin 4 receptor in a UK birth cohort                                                                               |
|  |                          |    | 33807560 | A Systematic Review of Genetic Polymorphisms Associated with Binge Eating Disorder.                                                                          |
|  |                          |    | 33761344 | Human MC4R variants affect endocytosis, trafficking and dimerization revealing multiple cellular mechanisms involved in weight regulation                    |

|  |  |  |          |                                                                                                                                                            |
|--|--|--|----------|------------------------------------------------------------------------------------------------------------------------------------------------------------|
|  |  |  | 33362866 | Identification of a Rare and Potential Pathogenic MC4R Variant in a Brazilian Patient With Adulthood-Onset Severe Obesity                                  |
|  |  |  | 32952152 | Evaluation of the MC4R gene across eMERGE network identifies many unreported obesity-associated variants                                                   |
|  |  |  | 32921795 | Obesity treatment effect in Danish children and adolescents carrying Melanocortin-4 Receptor mutations                                                     |
|  |  |  | 32916307 | Mouse models for V103I and I251L gain of function variants of the human MC4R display decreased adiposity but are not protected against a hypercaloric diet |
|  |  |  | 32697988 | Human Labor Pain Is Influenced by the Voltage-Gated Potassium Channel KV6.4 Subunit                                                                        |
|  |  |  | 32665031 | PWAS: proteome-wide association study:linking genes and phenotypes by functional variation in proteins                                                     |
|  |  |  | 31855179 | Common activation mechanism of class A GPCRs                                                                                                               |
|  |  |  | 31597922 | Distinctive mutational spectrum and karyotype disruption in long-term cisplatin-treated urothelial carcinoma cell lines                                    |
|  |  |  | 31358043 | A validated single-cell-based strategy to identify diagnostic and therapeutic targets in complex diseases                                                  |
|  |  |  | 31064983 | Pancreatic islet chromatin accessibility and conformation reveals distal enhancer networks of type 2 diabetes risk                                         |
|  |  |  | 31035493 | Melanocortin-4 Receptor and Lipocalin 2 Gene Variants in Spanish Children with Abdominal Obesity: Effects on BMI-SDS after a Lifestyle Intervention        |
|  |  |  | 31002796 | Human Gain-of-Function MC4R Variants Show Signaling Bias and Protect against Obesity                                                                       |
|  |  |  | 30981838 | Genetic screening for MC4R gene identifies three novel mutations associated with severe familial obesity in a cohort of Spanish individuals.               |
|  |  |  | 30863132 | Identification of the MC4R start lost mutation in a morbidly obese Brazilian patient                                                                       |
|  |  |  | 30256453 | Rare genetic variation in mitochondrial pathways influences the risk for Parkinson's disease                                                               |
|  |  |  | 30134862 | Relevance of polymorphisms in MC4R and BDNF in short normal stature                                                                                        |
|  |  |  | 30121879 | Genetics of Severe Obesity                                                                                                                                 |
|  |  |  | 30068297 | Heterozygous versus homozygous phenotype caused by the same MC4R mutation: novel mutation affecting a large consanguineous kindred                         |

|  |  |  |          |                                                                                                                                              |
|--|--|--|----------|----------------------------------------------------------------------------------------------------------------------------------------------|
|  |  |  | 30019023 | Structural Biology Helps Interpret Variants of Uncertain Significance in Genes Causing Endocrine and Metabolic Disorders                     |
|  |  |  | 29273807 | Protein-altering variants associated with body mass index implicate pathways that control energy intake and expenditure underpinning obesity |
|  |  |  | 29230297 | From genetics and epigenetics to the future of precision treatment for obesity                                                               |
|  |  |  | 28755272 | Polymorphism and methylation of the MC4R gene in obese and non-obese dogs                                                                    |
|  |  |  | 28567303 | Whole-genome sequencing expands diagnostic utility and improves clinical management in paediatric medicine                                   |
|  |  |  | 27460824 | The impact of tumor profiling approaches and genomic data strategies for cancer precision medicine                                           |
|  |  |  | 27013903 | Genetics and Epigenetics of Eating Disorders                                                                                                 |
|  |  |  | 26986070 | Characterization of Disease-Associated Mutations in Human Transmembrane Proteins                                                             |
|  |  |  | 26828654 | Analysis of Genes Involved in Body Weight Regulation by Targeted Re-Sequencing                                                               |
|  |  |  | 26788538 | Allelic variants of the Melanocortin 4 receptor (MC4R) gene in a South African study group                                                   |
|  |  |  | 26659599 | Reproducible Analysis of Post-Translational Modifications in Proteomes:Application to Human Mutations                                        |
|  |  |  | 26474449 | Practical Experience of the Application of a Weighted Burden Test to Whole Exome Sequence Data for Obesity and Schizophrenia                 |
|  |  |  | 26244670 | The prevalence of melanocortin-4 receptor gene mutations in Slovak obese children and adolescents.                                           |
|  |  |  | 26229975 | How genetic errors in GPCRs affect their function: Possible therapeutic strategies                                                           |
|  |  |  | 26167768 | An siRNA-based functional genomics screen for the identification of regulators of ciliogenesis and ciliopathy genes                          |
|  |  |  | 25419636 | Melanocortin-4 receptor gene variants are not associated with binge-eating behavior in nonobese patients with eating disorders.              |
|  |  |  | 25032700 | NCI-60 Whole Exome Sequencing and Pharmacological CellMiner Analyses                                                                         |



|  |  |  |          |                                                                                                                                                                          |
|--|--|--|----------|--------------------------------------------------------------------------------------------------------------------------------------------------------------------------|
|  |  |  | 24820477 | Genetic Association Study of Adiposity and Melanocortin-4 Receptor (MC4R) Common Variants: Replication and Functional Characterization of Non-Coding Regions             |
|  |  |  | 24705810 | The Sum of Many Parts: Potential Mechanisms for Improvement in Glucose Homeostasis After Bariatric Surgery                                                               |
|  |  |  | 24705671 | Long-Term Weight-Loss in Gastric Bypass Patients Carrying Melanocortin 4 Receptor Variants                                                                               |
|  |  |  | 24705254 | Genomic analysis of diffuse intrinsic pontine gliomas identifies three molecular subgroups and recurrent activating ACVR1 mutations                                      |
|  |  |  | 24611737 | Novel variants in the MC4R and LEPR genes among severely obese children from the Iberian population.                                                                     |
|  |  |  | 24574081 | Hyperphagia: Current Concepts and Future Directions Proceedings of the 2nd International Conference on Hyperphagia                                                       |
|  |  |  | 24385306 | The role of common and rare MC4R variants and FTO polymorphisms in extreme form of obesity.                                                                              |
|  |  |  | 24276017 | Brain-Derived Neurotrophic Factor in Human Subjects with Function-Altering Melanocortin-4 Receptor Variants                                                              |
|  |  |  | 23996627 | Family of melanocortin receptor (MCR) genes in mammals:mutations, polymorphisms and phenotypic effects                                                                   |
|  |  |  | 23819521 | Assessment of computational methods for predicting the effects of missense mutations in human cancers                                                                    |
|  |  |  | 23505181 | The missense variation landscape of FTO, MC4R and TMEM18 in obese children of African ancestry                                                                           |
|  |  |  | 23317811 | Obesity surgery: happy with less or eternally hungry?                                                                                                                    |
|  |  |  | 23270367 | Mutation screen in the GWAS derived obesity gene SH2B1 including functional analyses of detected variants                                                                |
|  |  |  | 23251400 | A Novel Melanocortin-4 Receptor Mutation MC4R-P272L Associated with Severe Obesity Has Increased Propensity To Be Ubiquitinated in the ER in the Face of Correct Folding |
|  |  |  | 23185251 | Melanocortin-4 Receptor Mutations and Polymorphisms Do Not Affect Weight Loss after Bariatric Surgery                                                                    |
|  |  |  | 23159449 | Weight-Independent Effects of Roux-en-Y Gastric Bypass on Glucose Homeostasis via Melanocortin-4 Receptors in Mice and Humans                                            |

|  |  |  |          |                                                                                                                                                              |
|--|--|--|----------|--------------------------------------------------------------------------------------------------------------------------------------------------------------|
|  |  |  | 23049848 | Association between Common Polymorphism near the MC4R Gene and Obesity Risk: A Systematic Review and Meta-Analysis                                           |
|  |  |  | 22535570 | Is there a genetic cause of appetite loss?:an explorative study in 1,853 cancer patients                                                                     |
|  |  |  | 22473907 | P-selectin genotype is associated with the development of cancer cachexia                                                                                    |
|  |  |  | 22447289 | Loss-of-function mutations in MC4R are very rare in the Greek severely obese adult population.                                                               |
|  |  |  | 22106157 | Greater Impact of Melanocortin-4 Receptor Deficiency on Rates of Growth and Risk of Type 2 Diabetes During Childhood Compared With Adulthood in Pima Indians |
|  |  |  | 22043165 | Genetics of Obesity: What have we Learned?                                                                                                                   |
|  |  |  | 22043164 | Molecular Basis of Obesity: Current Status and Future Prospects                                                                                              |
|  |  |  | 21976721 | The MC4R(I251L) allele is associated with better metabolic status and more weight loss after gastric bypass surgery.                                         |
|  |  |  | 21934689 | Is there a genetic cause for cancer cachexia? - a clinical validation study in 1797 patients                                                                 |
|  |  |  | 21404042 | Missense mutations and polymorphisms of the MC4R gene in Polish obese children and adolescents in relation to the relative body mass index                   |
|  |  |  | 21295023 | The genetic epidemiology of melanocortin 4 receptor variants.                                                                                                |
|  |  |  | 21085626 | Investigation of a Genome Wide Association Signal for Obesity: Synthetic Association and Haplotype Analyses at the Melanocortin 4 Receptor Gene Locus        |
|  |  |  | 20587078 | Genomic insights into early-onset obesity                                                                                                                    |
|  |  |  | 20406574 | Melanocortin-4 receptor gene variants in Chilean families: association with childhood obesity and eating behavior.                                           |
|  |  |  | 20127379 | From monogenic to polygenic obesity: recent advances                                                                                                         |
|  |  |  | 19046411 | Obesity genes: so close and yet so far...                                                                                                                    |
|  |  |  | 18835933 | Lower Metabolic Rate in Individuals Heterozygous for Either a Frameshift or a Functional Missense MC4R Variant                                               |
|  |  |  | 18559663 | Prevalence of Melanocortin-4 Receptor Deficiency in Europeans and Their Age-Dependent Penetrance in Multigenerational Pedigrees                              |
|  |  |  | 18454148 | Common variants near MC4R are associated with fat mass, weight and risk of obesity                                                                           |

|  |  |  |          |                                                                                                                                                                 |
|--|--|--|----------|-----------------------------------------------------------------------------------------------------------------------------------------------------------------|
|  |  |  | 17519222 | Non-synonymous polymorphisms in melanocortin-4 receptor protect against obesity: the two facets of a Janus obesity gene.                                        |
|  |  |  | 17286227 | A novel non-synonymous mutation in the melanocortin-4 receptor gene (MC4R) in a 2-year-old Austrian girl with extreme obesity.                                  |
|  |  |  | 16553946 | Prediction of indirect interactions in proteins                                                                                                                 |
|  |  |  | 16469222 | Melanocortin-4 receptor gene and complications after gastric banding.                                                                                           |
|  |  |  | 16231025 | Screening for melanocortin-4 receptor mutations in a cohort of Belgian morbidly obese adults and children.                                                      |
|  |  |  | 15037865 | Binge-eating episodes are not characteristic of carriers of melanocortin-4 receptor gene mutations.                                                             |
|  |  |  | 14764812 | Genetic screening for melanocortin-4 receptor mutations in a cohort of Italian obese patients: description and functional characterization of a novel mutation. |
|  |  |  | 12629567 | A novel nonsense mutation in the melanocortin-4 receptor associated with obesity in a Spanish population.                                                       |
|  |  |  | 10199800 | Several mutations in the melanocortin-4 receptor gene including a nonsense and a frameshift mutation associated with dominantly inherited obesity in humans.    |

**Supplementary Table 5: All publications regarding *MC4R* variants presented on [www.mc4r.org.uk](http://www.mc4r.org.uk).**

| Gene               | Variant     | Amino acid exchange | Number of entries found | Study                     | Amino Acid Exchange reported | PMID     |
|--------------------|-------------|---------------------|-------------------------|---------------------------|------------------------------|----------|
| <b><i>MC4R</i></b> | rs121913557 | p.V50L              | 6                       | unpublished study         | V50G                         | NA       |
|                    |             |                     |                         | Dubern B, 2001            | V50M                         | 11487744 |
|                    |             |                     |                         | Lubrano-Berthelie C, 2003 | V50M                         | 12499395 |
|                    |             |                     |                         | Tao YX, 2003              | V50M                         | 12959994 |
|                    |             |                     |                         | Xiang Z, 2010             | V50M                         | 20462274 |
|                    |             |                     |                         | Roubert P, 2010           | V50M                         | 20696697 |
|                    | rs2229616   | p.V103I             | 14                      | Gu W, 1999                | V103I                        | 10078568 |
|                    |             |                     |                         | Hinney A, 1999            | V103I                        | 10199800 |
|                    |             |                     |                         | Ho G, 1999                | V103I                        | 10585465 |
|                    |             |                     |                         | Jacobson P, 2002          | V103I                        | 12364415 |
|                    |             |                     |                         | Hinney A, 2003            | V103I                        | 12970296 |
|                    |             |                     |                         | Xiang Z, 2006             | V103I                        | 16752916 |
|                    |             |                     |                         | Stutzmann F, 2008         | V103I                        | 18559663 |
|                    |             |                     |                         | Calton MA, 2009           | V103I                        | 19091795 |
|                    |             |                     |                         | Thearle MS, 2012          | V103I                        | 22106157 |
|                    |             |                     |                         | Hatoum IJ, 2012           | V103I                        | 22492873 |
|                    |             |                     |                         | Melchior C, 2012          | V103I                        | 23146882 |
|                    |             |                     |                         | Rovite V, 2014            | V103I                        | 24385306 |
|                    |             |                     |                         | Moore BS, 2014            | V103I                        | 24705671 |
|                    |             |                     |                         | Brouwers B, 2021          | V103I                        | 33761344 |
|                    |             |                     |                         | Yeo GS, 2003              | T112NfsX11                   | 12588803 |
|                    | rs13447329  | p.T112M             | 22                      | Farooqi S, 2003           | T112NfsX11                   | 12646665 |
|                    |             |                     |                         | Hatoum IJ, 2012           | T112NfsX11                   | 22492873 |
|                    |             |                     |                         | Hinney A, 2006            | T112K                        | 16492696 |
|                    |             |                     |                         | Gu W, 1999                | T112M                        | 10078568 |

|  |            |         |    |                              |       |          |
|--|------------|---------|----|------------------------------|-------|----------|
|  |            |         |    | Hinney A, 1999               | T112M | 10199800 |
|  |            |         |    | Nijenhuis WA, 2003           | T112M | 12690102 |
|  |            |         |    | Hinney A, 2003               | T112M | 12970296 |
|  |            |         |    | Valli-Jaakola K, 2004        | T112M | 14764818 |
|  |            |         |    | Tao YX, 2005                 | T112M | 16030156 |
|  |            |         |    | Hinney A, 2006               | T112M | 16492696 |
|  |            |         |    | Xiang Z, 2006                | T112M | 16752916 |
|  |            |         |    | Stutzmann F, 2008            | T112M | 18559663 |
|  |            |         |    | Calton MA, 2009              | T112M | 19091795 |
|  |            |         |    | Melchior C, 2012             | T112M | 23146882 |
|  |            |         |    | Moore BS, 2014               | T112M | 24705671 |
|  |            |         |    | Brouwers B, 2021             | T112M | 33761344 |
|  |            |         |    | 1000Genomes release<br>17    | T112T | NA       |
|  | rs13447331 | p.S127L | 15 | Lubrano-Berthelie C,<br>2003 | S127L | 12499395 |
|  |            |         |    | Hinney A, 2003               | S127L | 12970296 |
|  |            |         |    | Valli-Jaakola K, 2004        | S127L | 14764818 |
|  |            |         |    | Govaerts C, 2005             | S127L | 16083993 |
|  |            |         |    | Hinney A, 2006               | S127L | 16492696 |
|  |            |         |    | Xiang Z, 2006                | S127L | 16752916 |
|  |            |         |    | Ahituv N, 2007               | S127L | 17357083 |
|  |            |         |    | Srinivasan S, 2007           | S127L | 17668051 |
|  |            |         |    | Stutzmann F, 2008            | S127L | 18559663 |
|  |            |         |    | Calton MA, 2009              | S127L | 19091795 |
|  |            |         |    | Fan ZC, 2009                 | S127L | 19298524 |
|  |            |         |    | Roubert P, 2010              | S127L | 20696697 |
|  |            |         |    | Rouskas K, 2012              | S127L | 22447289 |
|  |            |         |    | Hatoum IJ, 2012              | S127L | 22492873 |

|  |             |           |    |                              |            |          |
|--|-------------|-----------|----|------------------------------|------------|----------|
|  |             |           |    | Rovite V, 2014               | S127L      | 24385306 |
|  | novel       | p.Y153Y   | 1  | ExAC Browser                 | Y153C      | NA       |
|  | no rsID     | p.V193V   | 1  | Hinney A, 1999               | V193V      | 10199800 |
|  | rs13447338  | p.L211fsX | 10 | Yeo GS, 1998                 | L211MfsX6  | 9771698  |
|  |             |           |    | Hinney A, 1999               | L211MfsX6  | 10199800 |
|  |             |           |    | Ho G, 1999                   | L211MfsX6  | 10585465 |
|  |             |           |    | Yeo GS, 2003                 | L211MfsX6  | 12588803 |
|  |             |           |    | Farooqi S, 2003              | L211MfsX6  | 12646665 |
|  |             |           |    | Hinney A, 2003               | L211MfsX6  | 12970296 |
|  |             |           |    | Xiang Z, 2006                | L211MfsX6  | 16752916 |
|  |             |           |    | Ahituv N, 2007               | L211MfsX6  | 17357083 |
|  |             |           |    | Calton MA, 2009              | L211MfsX6  | 19091795 |
|  |             |           |    | Lubrano-Berthelie C,<br>2003 | L211P      | 12851297 |
|  | rs582820871 | p.I251L   | 17 | Hinney A, 2003               | I251WfsX34 | 12970296 |
|  |             |           |    | Lubrano-Berthelie C,<br>2004 | I251WfsX34 | 15126516 |
|  |             |           |    | Tan K, 2009                  | I251WfsX34 | 18801902 |
|  |             |           |    | Xiang Z, 2010                | I251WfsX34 | 20462274 |
|  |             |           |    | Aslan IR, 2011               | I251WfsX34 | 20733581 |
|  |             |           |    | van der Berg L, 2011         | I251WfsX34 | 20966905 |
|  |             |           |    | Bonnefond A, 2016            | I251F      | 27222505 |
|  |             |           |    | Vaisse C, 2000               | I251L      | 10903341 |
|  |             |           |    | Hinney A, 2003               | I251L      | 12970296 |
|  |             |           |    | Xiang Z, 2006                | I251L      | 16752916 |
|  |             |           |    | Thearle MS, 2012             | I251L      | 22106157 |
|  |             |           |    | Hatoum IJ, 2012              | I251L      | 22492873 |
|  |             |           |    | Melchior C, 2012             | I251L      | 23146882 |
|  |             |           |    | Rovite V, 2014               | I251L      | 24385306 |

|  |  |  |  |                   |       |          |
|--|--|--|--|-------------------|-------|----------|
|  |  |  |  | Moore BS, 2014    | I251L | 24705671 |
|  |  |  |  | Brouwers B, 2021  | I251L | 33761344 |
|  |  |  |  | unpublished study | I251T | NA       |





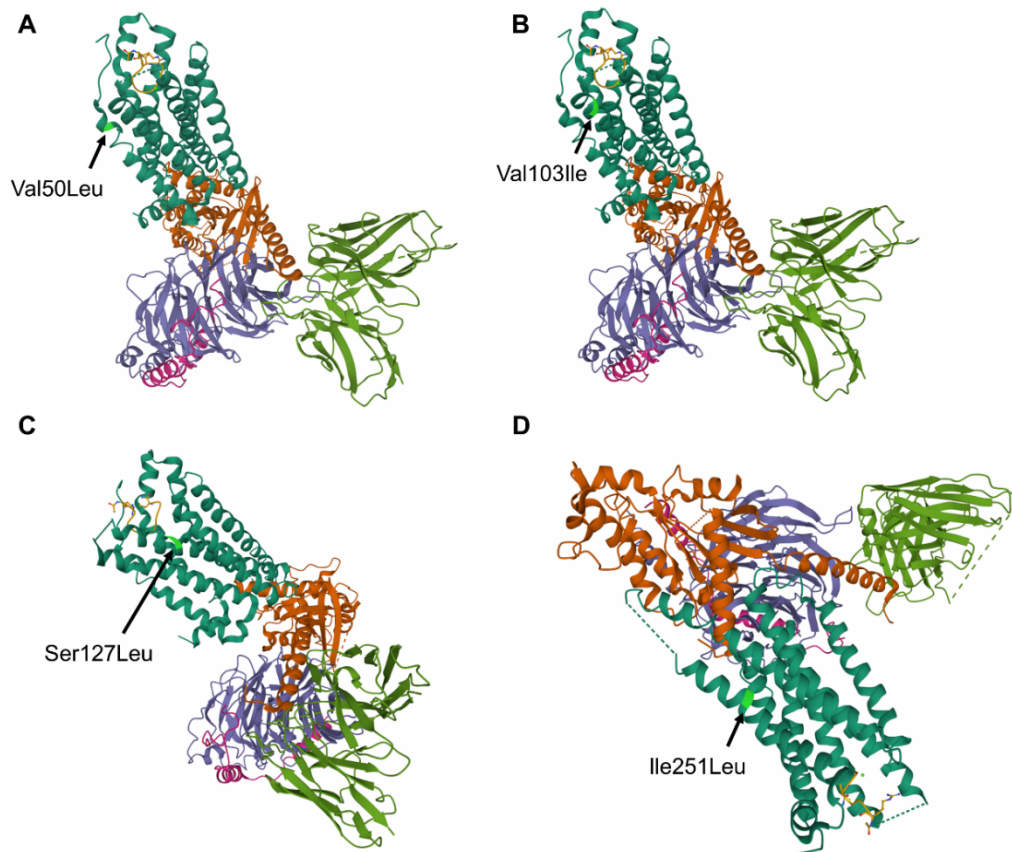

**Supplementary Figure 2: 3D structure of the MC4R protein.** The here detected *MC4R*-located non-synonymous variants p.Val50Leu (A, rs121913557), p.Val103Ile (B, rs2229616), p.Ser127Leu (C, rs13447331) and p.Ile251Leu (D, rs52820871) are marked in green and indicated by the arrow. The variant p.Thr112Met (rs13447329) could not be visualized as the used reference protein (RSC PDB: 7AUE; <sup>29</sup>) did not contain the corresponding region. To facilitate the visualization, the 3D structures have been rotated around their axis. The 3D structure was downloaded from RSC PDB.

## References

- 1 Allot, A. *et al.* LitVar: a semantic search engine for linking genomic variant data in PubMed and PMC. *Nucleic Acids Res* **46**, W530-W536 (2018). <https://doi.org/10.1093/nar/gky355>
- 2 Brouwers, B. *et al.* Human MC4R variants affect endocytosis, trafficking and dimerization revealing multiple cellular mechanisms involved in weight regulation. *Cell Rep* **34**, 108862 (2021). <https://doi.org/10.1016/j.celrep.2021.108862>
- 3 Paisdzior, S. *et al.* Differential Signaling Profiles of MC4R Mutations with Three Different Ligands. *Int J Mol Sci* **21** (2020). <https://doi.org/10.3390/ijms21041224>
- 4 Lotta, L. A. *et al.* Human Gain-of-Function MC4R Variants Show Signaling Bias and Protect against Obesity. *Cell* **177**, 597-607 e599 (2019). <https://doi.org/10.1016/j.cell.2019.03.044>
- 5 Rojo, D., McCarthy, C., Raingo, J. & Rubinstein, M. Mouse models for V103I and I251L gain of function variants of the human MC4R display decreased adiposity but are not protected against a hypercaloric diet. *Mol Metab* **42**, 101077 (2020). <https://doi.org/10.1016/j.molmet.2020.101077>
- 6 Geller, F. *et al.* Melanocortin-4 receptor gene variant I103 is negatively associated with obesity. *Am J Hum Genet* **74**, 572-581 (2004). <https://doi.org/10.1086/382490>

- 7 Rovite, V. *et al.* The role of common and rare MC4R variants and FTO polymorphisms in extreme form of obesity. *Mol Biol Rep* **41**, 1491-1500 (2014).  
<https://doi.org/10.1007/s11033-013-2994-4>
- 8 Rong, R. *et al.* Identification and functional characterization of three novel human melanocortin-4 receptor gene variants in an obese Chinese population. *Clin Endocrinol (Oxf)* **65**, 198-205 (2006). <https://doi.org/10.1111/j.1365-2265.2006.02573.x>
- 9 Melchior, C. *et al.* Clinical and functional relevance of melanocortin-4 receptor variants in obese German children. *Horm Res Paediatr* **78**, 237-246 (2012).  
<https://doi.org/10.1159/000343816>
- 10 Gu, W. *et al.* Identification and functional analysis of novel human melanocortin-4 receptor variants. *Diabetes* **48**, 635-639 (1999). <https://doi.org/10.2337/diabetes.48.3.635>
- 11 Ho, G. & MacKenzie, R. G. Functional characterization of mutations in melanocortin-4 receptor associated with human obesity. *J Biol Chem* **274**, 35816-35822 (1999).  
<https://doi.org/10.1074/jbc.274.50.35816>
- 12 Hinney, A. *et al.* Melanocortin-4 receptor gene: case-control study and transmission disequilibrium test confirm that functionally relevant mutations are compatible with a major gene effect for extreme obesity. *J Clin Endocrinol Metab* **88**, 4258-4267 (2003).  
<https://doi.org/10.1210/jc.2003-030233>
- 13 Xiang, Z. *et al.* Pharmacological characterization of 40 human melanocortin-4 receptor polymorphisms with the endogenous proopiomelanocortin-derived agonists and the agouti-related protein (AGRP) antagonist. *Biochemistry* **45**, 7277-7288 (2006).  
<https://doi.org/10.1021/bi0600300>
- 14 Thearle, M. S. *et al.* Greater impact of melanocortin-4 receptor deficiency on rates of growth and risk of type 2 diabetes during childhood compared with adulthood in Pima Indians. *Diabetes* **61**, 250-257 (2012). <https://doi.org/10.2337/db11-0708>
- 15 He, S. & Tao, Y. X. Defect in MAPK signaling as a cause for monogenic obesity caused by inactivating mutations in the melanocortin-4 receptor gene. *Int J Biol Sci* **10**, 1128-1137 (2014). <https://doi.org/10.7150/ijbs.10359>
- 16 Tao, Y. X. & Segaloff, D. L. Functional analyses of melanocortin-4 receptor mutations identified from patients with binge eating disorder and nonobese or obese subjects. *J Clin Endocrinol Metab* **90**, 5632-5638 (2005). <https://doi.org/10.1210/jc.2005-0519>
- 17 Valli-Jaakola, K. *et al.* Identification and characterization of melanocortin-4 receptor gene mutations in morbidly obese finnish children and adults. *J Clin Endocrinol Metab* **89**, 940-945 (2004). <https://doi.org/10.1210/jc.2003-031182>
- 18 Nijenhuis, W. A., Garner, K. M., van Rozen, R. J. & Adan, R. A. Poor cell surface expression of human melanocortin-4 receptor mutations associated with obesity. *J Biol Chem* **278**, 22939-22945 (2003). <https://doi.org/10.1074/jbc.M211326200>
- 19 Fan, Z. C. & Tao, Y. X. Functional characterization and pharmacological rescue of melanocortin-4 receptor mutations identified from obese patients. *J Cell Mol Med* **13**, 3268-3282 (2009). <https://doi.org/10.1111/j.1582-4934.2009.00726.x>
- 20 Falls, B. A. & Zhang, Y. Insights into the Allosteric Mechanism of Setmelanotide (RM-493) as a Potent and First-in-Class Melanocortin-4 Receptor (MC4R) Agonist To Treat Rare Genetic Disorders of Obesity through an in Silico Approach. *ACS Chem Neurosci* **10**, 1055-1065 (2019).  
<https://doi.org/10.1021/acschemneuro.8b00346>
- 21 Srinivasan, S., Santiago, P., Lubrano, C., Vaisse, C. & Conklin, B. R. Engineering the melanocortin-4 receptor to control constitutive and ligand-mediated G(S) signaling in vivo. *PLoS One* **2**, e668 (2007). <https://doi.org/10.1371/journal.pone.0000668>
- 22 Mo, X. L. & Tao, Y. X. Activation of MAPK by inverse agonists in six naturally occurring constitutively active mutant human melanocortin-4 receptors. *Biochim Biophys Acta* **1832**, 1939-1948 (2013). <https://doi.org/10.1016/j.bbadis.2013.06.006>
- 23 Xiang, Z. *et al.* Peptide and small molecules rescue the functional activity and agonist potency of dysfunctional human melanocortin-4 receptor polymorphisms. *Biochemistry* **46**, 8273-8287 (2007). <https://doi.org/10.1021/bi7007382>

- 24 Lubrano-Berthelier, C. *et al.* Intracellular retention is a common characteristic of childhood obesity-associated MC4R mutations. *Hum Mol Genet* **12**, 145-153 (2003). <https://doi.org:10.1093/hmg/ddg016>
- 25 Granell, S. *et al.* A novel melanocortin-4 receptor mutation MC4R-P272L associated with severe obesity has increased propensity to be ubiquitinated in the ER in the face of correct folding. *PLoS One* **7**, e50894 (2012). <https://doi.org:10.1371/journal.pone.0050894>
- 26 Prusis, P., Uhlen, S., Petrovska, R., Lapinsh, M. & Wikberg, J. E. Prediction of indirect interactions in proteins. *BMC Bioinformatics* **7**, 167 (2006). <https://doi.org:10.1186/1471-2105-7-167>
- 27 Omasits, U., Ahrens, C. H., Muller, S. & Wollscheid, B. Protter: interactive protein feature visualization and integration with experimental proteomic data. *Bioinformatics* **30**, 884-886 (2014). <https://doi.org:10.1093/bioinformatics/btt607>
- 28 Zhang, F. *et al.* Crystal structure of the obese protein leptin-E100. *Nature* **387**, 206-209 (1997). <https://doi.org:10.1038/387206a0>
- 29 Israeli, H. *et al.* Structure reveals the activation mechanism of the MC4 receptor to initiate satiation signaling. *Science* **372**, 808-814 (2021). <https://doi.org:10.1126/science.abf7958>
